## Dnmt3L cooperates with the Dnmt3 family of de novo DNA methyltransferases to establish maternal imprints in mice

Kenichiro Hata, Masaki Okano, Hong Lei, and En Li\*

Cardiovascular Research Center, Massachusetts General Hospital, Department of Medicine, Harvard Medical School, 149 13th Street, Charlestown, MA 02129, USA

\*Author for correspondence (e-mail: en@cvrc.mgh.harvard.edu)

Accepted 22 January 2002

### SUMMARY

Genomic imprinting is regulated by differential methylation of the paternal and maternal genome. However, it remains unknown how parental imprinting is established during gametogenesis. In this study, we demonstrate that Dnmt3L, a protein sharing homology with DNA methyltransferases, Dnmt3a and Dnmt3b, but lacking enzymatic activity, is essential for the establishment of maternal methylation imprints and appropriate expression of maternally imprinted genes. We also show that Dnmt3L interacts with Dnmt3a and Dnmt3b and co-localizes with these enzymes in the nuclei of transfected cells, suggesting that Dnmt3L may regulate genomic

imprinting via the Dnmt3 family enzymes. Consistent with this model, we show that [*Dnmt3a*<sup>-/-</sup>, *Dnmt3b*<sup>+/-</sup>] mice also fail to establish maternal methylation imprints. In addition, both Dnmt3a and Dnmt3L are required for spermatogenesis. Together, our findings suggest that Dnmt3L may cooperate with Dnmt3 family methyltransferases to carry out de novo methylation of maternally imprinted genes in oocytes.

Key words: Dnmt3L, Dnmt3a, De novo methylation, Genomic imprinting, Spermatogenesis, Mouse

### INTRODUCTION

Nuclear transfer experiments demonstrate that the maternal and paternal sets of genome are nonequivalent and both are required for normal development of the mouse embryo (McGrath and Solter, 1984; Surani et al., 1984; Barton et al., 1984). The differences between the paternal and maternal genome are inherited from the gametes in which parental imprinting of the genome (or genomic imprinting) is established. Genomic imprinting results in differential expression of the paternal and maternal alleles of a small set of genes known as imprinted genes. Among the 40 or so known imprinted genes, some, such as *H19*, *Igf2r* and *p57<sup>kip2</sup>* are expressed when inherited from the mother while others such as *Snrpn*, *Peg1* and *Peg3* are expressed when inherited from the father. The imprinted genes appear to function in a wide range of developmental processes such as regulation of embryonic development, placenta function, fetal growth, and maternal behaviors, and various theories have been proposed to explain the existence and function of genomic imprinting (Moore and Haig, 1991; Barlow, 1995; Jaenisch, 1997; Tilghman, 1999).

DNA methylation is believed to be the epigenetic mechanism that controls genomic imprinting in mammals. The presence of differentially methylated regions (DMRs) between paternal and maternal alleles in almost all imprinted genes provides a molecular basis for regulation of allele-specific expression of imprinted genes (Neumann and Barlow, 1996; Ferguson-Smith and Surani, 2001). DNA methylation is a

reversible epigenetic process and it can be reprogrammed during embryogenesis and gametogenesis (Reik et al., 2001). Parental methylation imprints are erased in the primordial germ cells during embryogenesis and are re-established during gametogenesis in male and female germ cells independently. Most imprinted genes, such as *Igf2r*, *Peg1* and *Snrpn*, acquire their methylation imprints in the female germ cells (Stöger et al., 1993; Lefebvre et al., 1997; Shemer et al., 1997), whereas two imprinted genes, *H19* and *Rasgrf1*, acquire their methylation imprints in the male germ cells (Tremblay et al., 1995; Pearsall et al., 1999). Obata et al. demonstrated, by transferring nuclei from immature oocytes to full-grown oocytes, that maternal genomic imprinting is established during oocyte growth (Obata et al., 1998). Studies of the paternally imprinted *H19* gene, in contrast, showed that paternal imprinting is established in male germ cells over a much longer period of germ cell development (Ueda et al., 2000; Davis et al., 2000). However, it remains unknown which DNA methyltransferases are required for de novo methylation of imprinted genes in the germ cells, and whether the methylation imprints acquired in the germ cells are essential for the establishment of genomic imprinting.

DNA methylation patterns are established and maintained during development by three distinctive DNA cytosine methyltransferases (Dnmt1, 3a, and 3b) (Bird and Wolffe, 1999). Dnmt1 is believed to function primarily as a maintenance methyltransferase that is required for stable inheritance of tissue-specific methylation patterns. Although

Dnmt1 can carry out de novo methylation in vitro, there is little evidence that it alone can initiate de novo methylation in vivo. Inactivation of Dnmt1 in mice leads to global loss of methylation and bi-allelic expression or silence of imprinted genes (Li et al., 1992; Li et al., 1993; Caspary et al., 1998). In contrast, Dnmt3a and Dnmt3b, but not Dnmt1, are essential for de novo methylation in embryonic stem cells and early postimplantation embryos (Okano et al., 1999) and Dnmt3a can carry out de novo methylation in transgenic flies (Lyko et al., 1999). This unique property of Dnmt3a and Dnmt3b predicts that these enzymes are probably also responsible for carrying out de novo methylation of imprinted genes in the germ cells.

Dnmt1 and Dnmt3 family methyltransferases do not appear to have any sequence-specificity beyond CpG dinucleotides, the prime targets for both classes of enzymes (Okano et al., 1998; Dodge et al., 2002). How these enzymes find their target sequences in the genes to be imprinted and methylate them differently in the male and female gametes remains an enigma. Other proteins might be necessary to target DNA methyltransferases to specific sequences in vivo or local chromatin conformation of a gene may determine the accessibility of its DNA by various DNA methyltransferases. While a number of proteins capable of interacting with Dnmt1, Dnmt3a or Dnmt3b, including PCNA, DMAP1, HDAC1, HDAC2, pRB and RP58, have been identified (Robertson and Wolffe, 2000; Fuks et al., 2001; Bachman et al., 2001), their function in modulating DNA methyltransferase activity, targeting DNA methyltransferases to specific sequences, or repressing transcription in vivo has not been determined.

In this study, we report that *Dnmt3L*, a gene that shares homology with Dnmt3 family methyltransferase genes, is required for the establishment of methylation imprints in oocytes. Dnmt3L, which by itself has no detectable DNA methyltransferase activity, appears to regulate methylation of imprinted genes through its interaction with DNA methyltransferases, Dnmt3a and Dnmt3b. Consistent with this hypothesis, we show that Dnmt3L binds and colocalizes with Dnmt3a and Dnmt3b in the nuclei of mammalian cells. Like *Dnmt3L*<sup>-/-</sup> mutants, [*Dnmt3a*<sup>-/-</sup>, *Dnmt3b*<sup>+/-</sup>] female mice also fail to establish maternal methylation imprints. Our results thus provide genetic evidence that Dnmt3 family methyltransferases and a potential cofactor Dnmt3L are required for de novo methylation of imprinted genes in the female gametes.

## MATERIALS AND METHODS

### Targeted disruption of the *Dnmt3L* gene in ES cells and mice

To construct *Dnmt3L* targeting vectors, a 9 kb *SacII*-*EcoRI* fragment containing exon 1 and a 2.8 kb *BamHI* fragment containing exons 8, 9 and part of exon 10 were inserted into pBluscript II SK. The IRES- $\beta$ geo cassette with the splicing accept site (Mountford et al., 1994) or a PGK-hygromycin cassette was inserted into a *Xho* site between exons 1 and 2 in the same transcriptional orientation as *Dnmt3L* (Fig. 2A). The targeting vectors were transfected into ES cells and drug-resistant clones were selected as described (Li et al., 1992). Positively recombined clones were identified by Southern blot analysis. DNA from ES cell clones was digested with *NsiI*, blotted and hybridized to an external probe. The wild-type, IRES- $\beta$ geo and hygromycin alleles give fragments of 6.8 kb, 17.4 kb and 12.6 kb, respectively (Fig. 2A).

### Construction of myc- or GFP-tagged Dnmt3a, Dnmt3b and Dnmt3L

Dnmt3a, Dnmt3b and Dnmt3L were fused with EGFP or tagged with a myc-tag at their N termini. *Dnmt3a*, *Dnmt3b* and *Dnmt3L* coding regions were amplified by PCR with primers for Dnmt3a (5'-aat-gaattccagcggcccggggac-3' and 5'-cacgaattcagtttcccccatgt-3'), Dnmt3b (5'-aatgaattcagacagcagacatctgaa-3', and 5'-cgagaattccccagtc-ctgggtaga-3'), and Dnmt3L (5'-tcaagaattccccggagaca-3' and 5'-tgaatatccagaagaagggc-3'). The amplified DNA fragments were subcloned into *EcoRI* and *SacII* sites of pEGFP-C1 (Clontech) or *EcoRI* and *XbaI* sites of myc-pcDNA3.1 (Chen and Richard, 1998).

### Co-transfection of COS cells and immunoprecipitations

Myc- or GFP-tagged proteins were expressed in COS cells by transfection of cDNA expression vectors using LIPOFECTAMINE PLUS (Invitrogen). The COS cells were lysed in the lysis buffer (1% Triton X-100, 150 mM NaCl, 20 mM Tris-HCl (pH 8.0), 50 mM NaF, 100  $\mu$ M sodium vanadate, 0.01% phenylmethylsulfonyl fluoride, 1  $\mu$ g aprotinin per ml and 1  $\mu$ g leupeptin per ml), and the cellular debris and nuclei were removed by centrifugation. The cell lysates were incubated with anti-GFP antibody or anti-myc antibody (Roche) at 4°C for 1 hour, then 40  $\mu$ l of 50% slurry of Protein A Sepharose CL-4B (Pharmacia Biotech) were added and incubated at 4°C for 1 hour. The beads were washed twice with lysis buffer and once with phosphate-buffered saline. The samples were analyzed by SDS-PAGE and transferred to PVDF membrane. The designated primary antibody (anti-GFP or anti-myc antibody) was used followed by goat anti-mouse IgG antibody conjugated to horseradish peroxidase (Jackson ImmunoResearch).

### Co-transfection of NIH3T3 cells and immunofluorescence microscopy

NIH 3T3 cells were plated 12 hours before transfection, typically at a density of 10<sup>5</sup> cells/484 mm<sup>2</sup> glass coverslip. Cells were transfected with DNA constructs, including GFP vector, GFP-*Dnmt3a*, GFP-*Dnmt3b*, myc vector and myc-*Dnmt3L*, using LIPOFECTAMINE PLUS (Invitrogen). 12 hours after transfection, the cells were fixed with 4% paraformaldehyde in PBS for 15 minutes and permeabilized with 1% Triton X-100 in PBS for 5 minutes. The fixed cells were incubated with anti-myc antibody (Roche; 1:1000) at room temperature for 1 hour and subsequently with a rhodamine-conjugated goat anti-mouse secondary antibody (Jackson ImmunoResearch; 1:300) for 30 minutes. The nuclei were stained with 3  $\mu$ g of 4,6-diamidino-2-phenylindole (DAPI)/ml. The staining patterns of the cells were examined by fluorescence microscopy.

### Ovary transplantation

Ovaries were removed from 2-week old *Dnmt3a*<sup>-/-</sup> or [*Dnmt3a*<sup>-/-</sup>, *Dnmt3b*<sup>+/-</sup>] females and transplanted into 4-week old C57BL/6J  $\times$  129S1/SvImJ F1 females (The Jackson Laboratory) as described previously (Hogan et al., 1994).

### X-gal staining and histology

Testes and ovaries were removed and fixed with Bouin's solution (Sigma) for Hematoxylin and Eosin staining or with 0.2% paraformaldehyde for staining with X-gal followed by counter-staining with Nuclear Fast Red as described previously (Hogan et al., 1994).

### Northern blot analysis, whole-mount in situ hybridization

Total RNA prepared from ES cells, embryoid bodies, or E9.5 embryos was analyzed by northern hybridization. Full length *Dnmt3L* cDNA (AF220524) was used as a probe. cDNA probes for *Peg1* (a gift from A. Surani) and *Snrpn* (amplified by RT-PCR) were used for northern analysis. For whole-mount in situ hybridization, E7.5 and E8.5 embryos were dissected out and fixed in 4% paraformaldehyde in PBS with 0.1% Tween 20 at 4°C overnight. Antisense RNA probes were generated by transcription using digoxigenin UTP (Roche) with

full length *Dnmt3L* cDNA as a template. Whole-mount in situ hybridization was performed as described previously (Hogan et al., 1994).

### DNA methylation analysis

E9.5 wild-type and mutant embryos were removed from pregnant mothers. Yolk sac DNA was used for genotype analysis. DNA isolated from embryos (or ES cell lines) was digested with methylation sensitive or methylation insensitive enzymes, and analyzed by Southern hybridization as previously described (Lei et al., 1996). The probes used for methylation studies were: pMO for endogenous C-type retroviruses (Lei et al., 1996); the *Igf2r* region 2 probe (Stöger et al., 1993); the *H19* upstream region (Tremblay et al., 1995); *Igf2* DMR2 (Feil et al., 1994); 5' region of *Xist* cDNA (Sado et al., 2000); *Rasgrf1* Sp-4 repeat region (Pearsall et al., 1999); *Peg1* (Lefebvre et al., 1997); and *Snrpn* DMR1 (Shemer et al., 1997). Bisulfite

sequencing analysis of the *Igf2r* region 2 and the *Peg3* DMR was performed as described previously (Clark et al., 1994). The primer sequences and PCR conditions were kindly provided by J. Walter and A. Paldi and are available upon requests.

## RESULTS

### Expression of *Dnmt3L* in ES cells, placenta and gametes

In the search for the Dnmt3 family DNA methyltransferase related genes in the dbEST database, we identified and cloned a mouse gene (GeneBank number: AF220524) that shared some degree of homology with *Dnmt3a* and *Dnmt3b* (Fig. 1A). The human homologue, termed DNMT3-like (*DNMT3L*), was

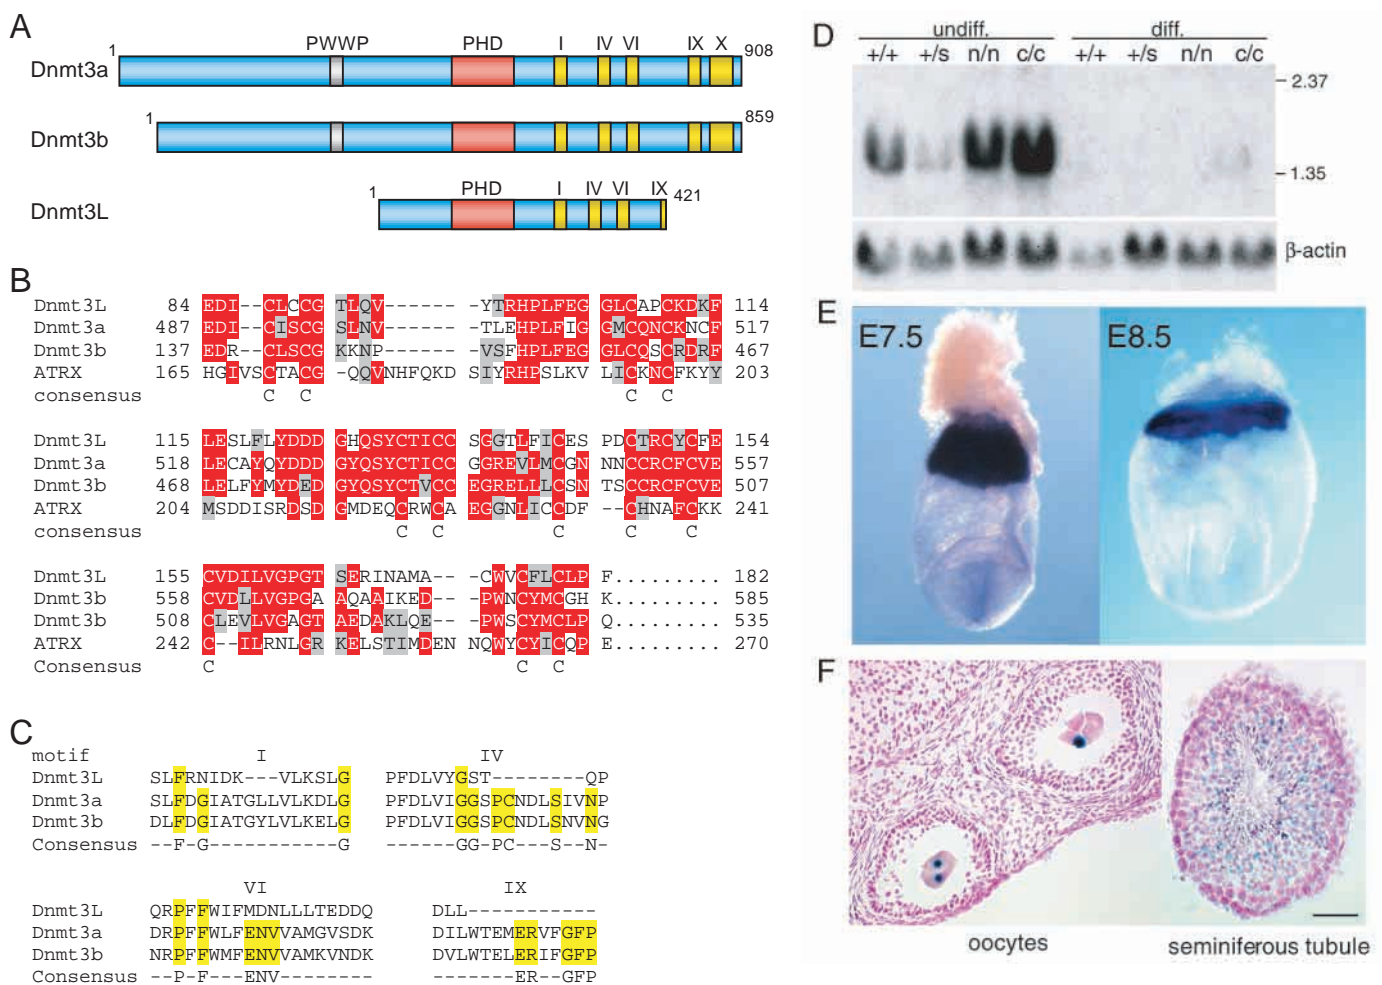

**Fig. 1.** Protein structure, sequence alignment and expression of *Dnmt3L*. (A) Schematic diagrams of mouse *Dnmt3L* (421 a.a.), *Dnmt3a* (908 a.a.), and *Dnmt3b* (859 a.a.) protein structures. The red block represents the PHD-like domain. The yellow bars represent the five highly conserved cytosine methyltransferase motifs in *Dnmt3a* and *Dnmt3b*. *Dnmt3L* contains motifs I, IV, VI, and part of IX, but not motif X. (B) Sequence alignment of the PHD-like domain. Conserved amino acid residues are highlighted in red while similar residues are highlighted in gray. The PHD-like domains are highly conserved among the *Dnmt3* family members and the X-linked *ATRX* gene. (C) Sequence alignment of motifs I, IV, VI and IX. Note that *Dnmt3L* lacks the consensus amino acid residues PC in motif IV and ENV in motif VI, which form the catalytic center of cytosine methyltransferases. (D) A northern blot of total RNA (20 µg/lane) from undifferentiated ES cells (undiff) and differentiated embryoid bodies (diff) was hybridized with a *Dnmt3L* full-length cDNA probe. +, n, s and c represent wild-type and various *Dnmt1* mutant alleles (Okano et al., 1998). The blot was rehybridized with a  $\beta$ -actin probe as an RNA loading control. (E) Whole-mount in situ hybridization of E7.5 and E8.5 embryos using a *Dnmt3L* cDNA probe reveals high expression predominantly in the chorion. (F) X-gal staining of *Dnmt3L*<sup>+/-</sup> adult mice carrying the IRES- $\beta$ geo marker driven by the endogenous *Dnmt3L* promoter shows *Dnmt3L* expression in the oocyte and in male germ cells in the seminiferous tubule. Scale bar: 40 µm.



**Fig. 2.** Targeted disruption of *Dnmt3L* and analysis of DNA methylation in *Dnmt3L*<sup>-/-</sup> mutant ES cells. (A) Gene targeting at the *Dnmt3L* locus. The top line shows the wild-type genomic locus. The vertical bars represent the exons starting from the first coding exon 1 to exon 11. The targeting vectors were constructed by replacing exons 2-7, which encode the entire PHD domain and part of motif 1, either with an IRES- $\beta$ geo or a PGK-hygromycin (Hyg) cassette. S, *Sac*II; N, *Nsi*I; RV, *Eco*RV; and B, *Bam*HI. (B) Southern analysis of the genotype of mutant ES cell lines. Genomic DNA was digested with *Nsi*I and hybridized with a 3' external probe. J1, the wild-type parental line; 277 and 280, *Dnmt3L*<sup>+/-</sup> lines; and 196, a *Dnmt3L*<sup>-/-</sup> line ( $\beta$ geo/hyg). (C-E) Genomic DNA from wild-type and mutant ES cell lines, as described in B, was digested with designated enzymes and hybridized to the MMLV, *Igf2* DMR2, and the *Igf2r* region 2 probes. Two independent *Dnmt3L*<sup>-/-</sup> lines, 80 and 196, were used. No significant difference in DNA

methylation was detected between wild-type and *Dnmt3L*<sup>-/-</sup> lines. m, maternal allele; p, paternal allele.

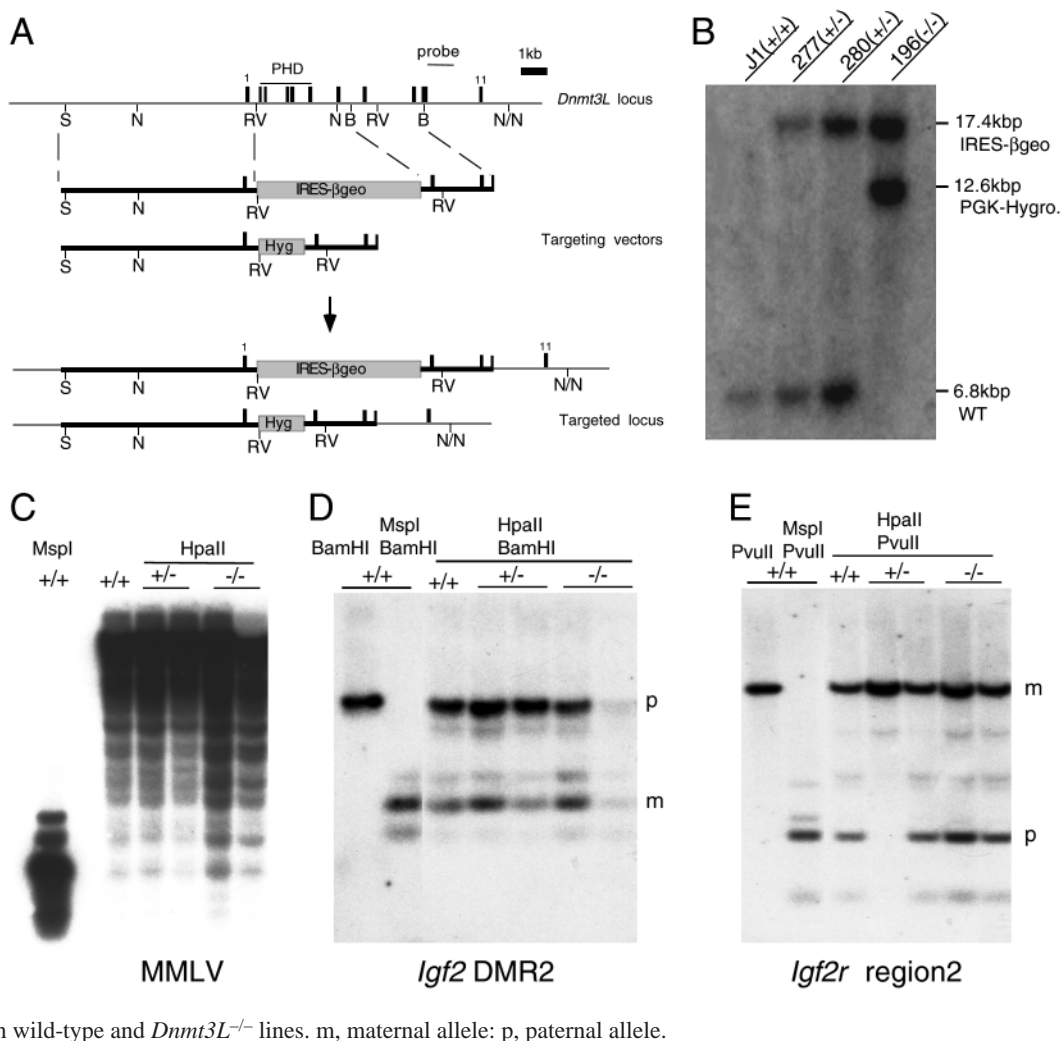

previously reported (Aapola et al., 2000). The human and mouse Dnmt3L proteins share ~60% of amino acid identity. Dnmt3L contains a PHD-like cysteine-rich domain that is most closely related to that of Dnmt3a, Dnmt3b and a protein encoded by the X-linked *ATRX* gene (Fig. 1B). Its carboxy-terminal domain is related to the enzyme domain of Dnmt3a and Dnmt3b, but it lacks the conserved PC and ENV residues in motifs IV and VI, respectively (Fig. 1C), which are known to form the catalytic center of DNA cytosine methyltransferases (Cheng et al., 1993). Recombinant Dnmt3L protein produced using the baculovirus expression system failed to methylate DNA in standard methyltransferase assays (data not shown). Therefore, it seemed unlikely that *Dnmt3L* would encode a functional DNA cytosine methyltransferase.

Northern blot analysis showed that *Dnmt3L* was highly expressed in embryonic stem (ES) cells and was down regulated in differentiated embryoid bodies (Fig. 1D). Whole-mount in situ hybridization using a *Dnmt3L* cDNA probe showed that *Dnmt3L* transcripts were primarily detected in the chorion in E7.5 and E8.5 embryos (Fig. 1E). *Dnmt3L* expression was also detected in the oocytes and differentiating spermatocytes of newborn and adult mice as shown by X-gal staining of the knockout mice containing an IRES- $\beta$ geo cassette (see below) (Fig. 1F). The positive X-gal staining

indicates that *Dnmt3L* is transcribed in the oocytes, but the expression level and localization of Dnmt3L protein in oocytes remains to be determined. The expression pattern of *Dnmt3L* in the ES cells, chorion, and gonads is strikingly similar to that of *Dnmt3a* and *Dnmt3b* (Okano et al., 1998; Okano et al., 1999), suggesting that *Dnmt3L* may play an important role in regulation of *Dnmt3a* and *Dnmt3b* during mouse development.

### Zygotic *Dnmt3L* is not essential for embryonic development

To investigate the function of *Dnmt3L* in mouse development, we disrupted the *Dnmt3L* gene in ES cells and mice by replacing the *Dnmt3L* genomic DNA (exons 2-7) with a promoterless IRES- $\beta$ geo cassette through gene targeting (Fig. 2A). Mice carrying *Dnmt3L* mutations were derived from two independently derived *Dnmt3L*<sup>+/-</sup> ES cell clones. Mice homozygous for the *Dnmt3L* mutation were viable and survived to adulthood without discernible morphological abnormalities. We also generated *Dnmt3L*<sup>-/-</sup> ES cell lines by knocking out the remaining wild-type allele in *Dnmt3L*<sup>+/-</sup> ES cells with a second targeting construct containing a hygromycin selection marker (Fig. 2A,B). Northern hybridization using a full-length cDNA probe did not detect transcripts from the IRES- $\beta$ geo allele, but it detected a weak

transcript of smaller size from the hygromycin allele in ES cells (data not shown). Since the entire PHD domain and part of motif I were deleted in both alleles and the mutant allele was expressed at very low levels, we believe that these mutations should be functionally null. Although *Dnmt3L* was highly expressed in ES cells, *Dnmt3L*<sup>-/-</sup> ES cell lines grew normally in culture and differentiated into various tissues in teratomas (data not shown).

To determine whether *Dnmt3L* played any role in regulation of DNA methylation, we carried out DNA methylation analysis of several repetitive elements and imprinted genes in mutant ES cells and mice. No significant changes in DNA methylation patterns of the endogenous retrovirus DNA, DMR2 of *Igf2*, and region 2 of *Igf2r* were detected in *Dnmt3L*<sup>-/-</sup> ES cell lines (Fig.

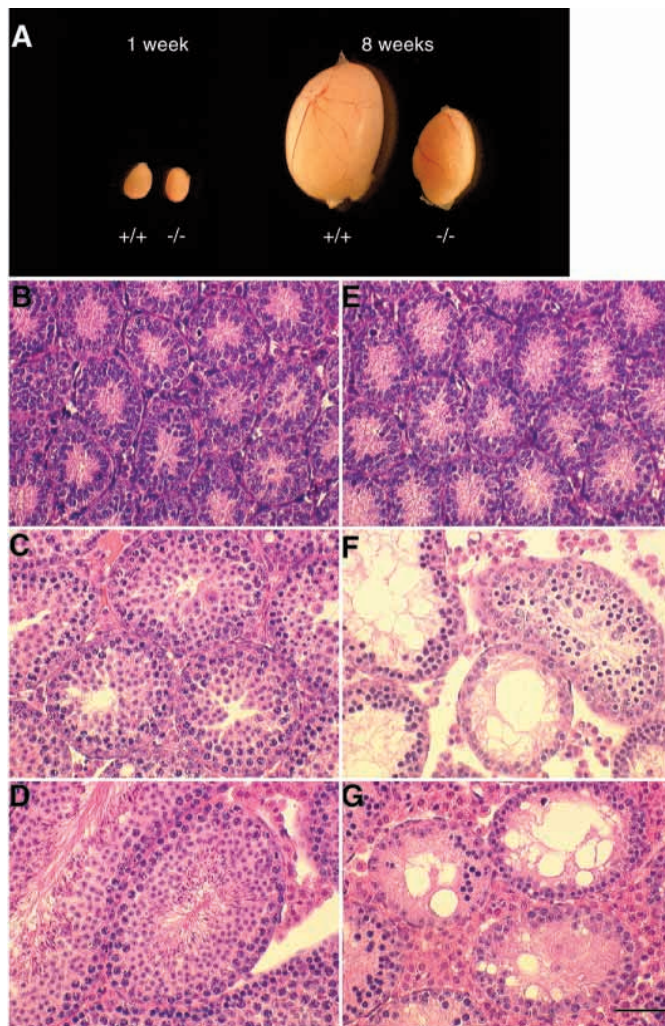

**Fig. 3.** Gross morphology and histology of wild-type and *Dnmt3L*<sup>-/-</sup> testes. (A) Gross morphology of testes of wild-type (+/+) and *Dnmt3L*<sup>-/-</sup> (-/-) mice at 1 week and 8 weeks of age. (B-G) Testes from wild-type (B-D) and *Dnmt3L*<sup>-/-</sup> (E-G) mice at 1 week (B,E), 4 weeks (C,F), and 8 weeks after birth (D,G). The number of spermatogonia in 1-week old testes was not significantly different in wild-type and mutant mice. At 4 weeks of age, most seminiferous tubules in *Dnmt3L*<sup>-/-</sup> testes contained very few differentiated spermatocytes. At 8 weeks of age, *Dnmt3L*<sup>-/-</sup> testes contained almost no spermatids or spermatozoa, which are normally present in the lumen of wild-type seminiferous tubules. Scale bar: 100  $\mu$ m.

2C-E). Analysis of DNA methylation in somatic tissues of *Dnmt3L*<sup>-/-</sup> mice also failed to detect any change of the methylation patterns of several repeats and imprinted genes (data not shown). Thus, we concluded that the zygotic function of *Dnmt3L* is not essential for global methylation in ES cells and mice. However, these experiments do not exclude the possibility that *Dnmt3L* may play a role in regulation of DNA methylation in a tissue-specific or developmental stage-specific manner.

### ***Dnmt3L* mutation results in male sterility and a maternal effect on embryonic development**

Since *Dnmt3L* expression was detected in the germ cells (Fig. 1F), we investigated the function of *Dnmt3L* in reproduction by breeding *Dnmt3L*<sup>-/-</sup> mice with wild-type mice. We found that the male *Dnmt3L*<sup>-/-</sup> mice were completely infertile. Examination of testes in *Dnmt3L*<sup>-/-</sup> mice revealed that the size of the testis of mutant mice was normal at birth, but significantly reduced at 8 weeks of age as compared to wild-type mice (Fig. 3A). In the testis of wild-type mice, the mitotically active spermatogonia reside near the periphery of the seminiferous tubule (Fig. 3B). They migrate towards the lumen of the tubule as they differentiate into spermatocytes and undergo meiosis (Fig. 3C), and then further differentiate into spermatids or spermatozoa (Fig. 3D). Testes from 1-week old *Dnmt3L*<sup>-/-</sup> appeared to be normal in size and contained a relatively normal number of spermatogonia in the seminiferous tubules (Fig. 3E). However, the spermatogonia either failed to differentiate into spermatocytes or in some cases differentiated into abnormal spermatocytes (Fig. 3F). In the testes of adult *Dnmt3L*<sup>-/-</sup>, very few differentiated spermatids or spermatozoa were found although a small number of spermatogonia were still present (Fig. 3F). These results suggest that *Dnmt3L* function is probably required for the differentiation of spermatogonia, consistent with the expression pattern of *Dnmt3L* in the testis. Whether disruption of *Dnmt3L* leads to meiotic defects is under investigation.

Unlike the male *Dnmt3L*<sup>-/-</sup> mice, the female homozygous mice were fertile. However, no live pups were born from female *Dnmt3L*<sup>-/-</sup> mice. To determine when embryos died in the uterus of *Dnmt3L*<sup>-/-</sup> mothers, we dissected embryos at different developmental stages. We found that embryos were grossly normal at E8.5, but were slightly smaller than normal embryos at E9.5 and died around E10.5. The most striking developmental defects were found in the head region with most embryos showing mild defects in neural tube closure and some displaying severe rostral neural tube defects (Fig. 4C). The cardiac development appeared to be normal. The chorion-placenta was smaller than that of a normal E9.5 embryo, suggesting that placental defects might be the cause of embryonic lethality (data not shown). These results demonstrate that the function of maternally expressed *Dnmt3L* is essential for embryonic development.

To further determine whether the maternal effect of *Dnmt3L* mutation resided in the egg or in the uterus, we performed embryo transfer experiments. We mixed 31 blastocysts from pregnant *Dnmt3L*<sup>-/-</sup> mothers and 26 blastocysts from wild-type mothers and transferred them into the uteri of seven wild-type females. We dissected embryos at E9.5 or E10.5 and recovered 11 *Dnmt3L*<sup>+/-</sup> (from *Dnmt3L*<sup>-/-</sup> mothers mated with wild-type males) and 18 wild-type embryos. While wild-type embryos



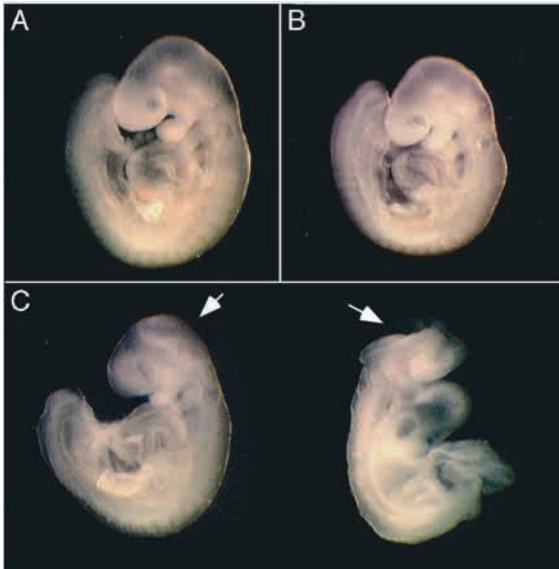

**Fig. 4.** Developmental defects of *Dnmt3L*<sup>mat-/-</sup> embryos from *Dnmt3L*<sup>-/-</sup> mothers. (A) A wild-type E9.5 embryo, (B) a *Dnmt3L*<sup>-/-</sup> littermate, and (C) *Dnmt3L*<sup>mat-/-</sup> embryos. Most *Dnmt3L*<sup>mat-/-</sup> embryos (left, 85%) show mild defects such as a smaller brain, incomplete closure of the rostral end of the neural tube (arrow), and smaller branchial arches. Some *Dnmt3L*<sup>mat-/-</sup> embryos (right, 15%) display severe developmental defects, including an open neural tube in the midbrain region (arrow), smaller forebrain, and incomplete turning.

were normal, all 11 mutant embryos displayed similar developmental defects as conceptuses from *Dnmt3L*<sup>-/-</sup> mice. These results strongly suggest that the maternal function of *Dnmt3L* resides in the egg or preimplantation embryos rather than in the uterus.

Since *Dnmt3L* is expressed in early embryos, it is possible that the maternal *Dnmt3L* may compensate the loss of zygotic *Dnmt3L* during early development of *Dnmt3L*<sup>-/-</sup> embryos. To test this possibility, we crossed male *Dnmt3L*<sup>+/-</sup> mice with female *Dnmt3L*<sup>-/-</sup> mice. If the maternal *Dnmt3L* transcripts present in preimplantation embryos are required for preimplantation or early postimplantation development, we would expect to recover no viable *Dnmt3L*<sup>-/-</sup> embryos at E9.5 or to observe more severe defects in *Dnmt3L*<sup>-/-</sup> embryos than in *Dnmt3L*<sup>+/-</sup> embryos. We dissected a total of 29 embryos and found 13 *Dnmt3L*<sup>-/-</sup> embryos and 16 *Dnmt3L*<sup>+/-</sup> embryos with indistinguishable phenotypes. Since both maternal and zygotic *Dnmt3L* transcripts were abolished in the *Dnmt3L*<sup>-/-</sup> embryos, this result strongly suggested that *Dnmt3L* was not essential for early development of the mouse embryo.

#### ***Dnmt3L*<sup>-/-</sup> females fail to establish methylation imprints in the oocytes**

We then investigated whether *Dnmt3L* was required for the establishment of genomic imprinting in the oocytes and appropriate expression of maternally imprinted genes. We analyzed the methylation status of differentially methylated regions (DMRs) of several imprinted genes in embryos of *Dnmt3L*<sup>-/-</sup> mothers (we designated such embryos as *Dnmt3L*<sup>mat-/-</sup> to distinguish them from embryos from wild-type and *Dnmt3L*<sup>+/-</sup> mothers). We showed that the maternally

imprinted regions such as the region 2 CpG island of *Igf2r*, the DMR of *Peg3*, the DMR1 of *Snrpn*, and the DMR of *Peg1* are almost completely demethylated in *Dnmt3L*<sup>mat-/-</sup> embryos, as shown either by bisulfite sequencing or southern blot analysis, while these regions were partially methylated in the control embryos as expected since only the maternal alleles were normally methylated (Fig. 5A-D) (Stöger et al., 1993; Li et al., 2000; Shemer et al., 1997; Lefebvre et al., 1997). In contrast, the methylation patterns of paternally imprinted genes such as *H19* and *Rasgrf1* were unaffected in the *Dnmt3L*<sup>mat-/-</sup> embryos as compared to wild-type embryos (Fig. 5E,F), consistent with the fact that methylation imprints of *H19* and *Rasgrf1* are inherited from the male germ cells (Tremblay et al., 1995; Pearsall et al., 1999). Methylation of the 5' region of *Xist* and the endogenous retrovirus DNA was also unaffected in *Dnmt3L*<sup>mat-/-</sup> embryos (data not shown). This is expected as de novo methylation of these sequences occurs in blastocysts around implantation, erasing the difference in methylation between the paternal and maternal genome. These results indicate that *Dnmt3L* is required for the establishment of maternal methylation imprints.

We then analyzed expression of several maternally imprinted genes, including *Igf2r*, *p57<sup>Kip2</sup>*, *Peg1* and *Snrpn* in *Dnmt3L*<sup>mat-/-</sup> embryos to see whether disruption of methylation imprinting in the oocytes lead to abnormal expression of these genes in the offspring. Previous studies showed that maternal methylation of *Igf2r* region 2 CpG island is associated with expression of the gene and abrogation of methylation leads to silencing of the maternal allele (Stöger et al., 1993; Li et al., 1993). Other experiments showed that blocking maternal epigenetic modification by transferring nuclei from the non-grown oocyte into enucleated mature oocytes represses expression of the maternal alleles of *Igf2r* and *p57<sup>Kip2</sup>* in the parthenotes (Obata et al., 1998). We showed that expression of both *Igf2r* and *p57<sup>Kip2</sup>* was diminished in the *Dnmt3L*<sup>mat-/-</sup> embryos (Fig. 5G). Opposite to *Igf2r* and *p57<sup>Kip2</sup>*, the paternal alleles of *Peg1* and *Snrpn* are expressed and the maternal alleles are repressed by methylation (Lefebvre et al., 1997; Leff et al., 1992). We showed, by northern analysis, that the expression level of both *Peg1* and *Snrpn* in *Dnmt3L*<sup>mat-/-</sup> embryos was increased to approximately twice the level in wild-type embryos, as determined by phosphoimaging (Molecular Dynamics) (Fig. 5H). Collectively, these results suggest that the failure of *Dnmt3L*<sup>-/-</sup> female mice to establish methylation imprints leads to aberrant expression of maternally imprinted genes.

#### ***Dnmt3L* may regulate maternal imprinting by interacting with *Dnmt3a* and *Dnmt3b***

Since *Dnmt3L* protein possessed no detectable methyltransferase activity, it would have to effect methylation of imprinted genes through one of the known DNA methyltransferases. *Dnmt3a* and *Dnmt3b* were favored candidates as both had been shown to carry out de novo methylation in vivo (Okano et al., 1999; Lyko et al., 1999). We first investigated whether *Dnmt3L* could interact with *Dnmt3a* and *Dnmt3b* by transfecting GFP-tagged *Dnmt3L* and myc-tagged *Dnmt3a* or *Dnmt3b* cDNA into COS cells followed by immunoprecipitation. We found that GFP-*Dnmt3L* was co-precipitated with myc-*Dnmt3a* and myc-*Dnmt3b* by the anti-myc antibody (Fig. 6A). The GFP-*Dnmt3L* signal was weak in myc-*Dnmt3b* transfected cells because of poor expression of the

**Fig. 5.** Disruption of methylation and expression of maternally imprinted genes in *Dnmt3L*<sup>mat-/-</sup> embryos. (A-D) Methylation of four maternally imprinted genes (*Igf2r*, *Peg3*, *Snrpn* and *Peg1*) were analyzed by either bisulfite sequencing or southern blot hybridization with genomic DNA isolated from E9.5 wild-type (+/+), *Dnmt3L*<sup>+/-</sup> (+/-), *Dnmt3L*<sup>-/-</sup> (-/-) and *Dnmt3L*<sup>mat-/-</sup> (mat-/-) embryos. (A,B) Bisulfite sequencing analysis (methylation shown as black circles) shows that the *Igf2r* region 2 and *Peg3* DMR are almost completely unmethylated in *Dnmt3L*<sup>mat-/-</sup> embryos, whereas they are partially methylated in wild-type and *Dnmt3L*<sup>-/-</sup> embryos. (C,D) Southern blot analysis of the *Snrpn* DMR1 and the *Peg1* DMR shows that the maternal alleles (m) of both genes are methylated in wild-type and *Dnmt3L*<sup>-/-</sup> embryos, but unmethylated in *Dnmt3L*<sup>mat-/-</sup> embryos. (E,F) No change in methylation of paternally imprinted genes, *Rasgrf1* and *H19*, was observed in *Dnmt3L*<sup>mat-/-</sup> embryos. (G,H) Expression of four maternally imprinted genes (*Igf2r*, *p57<sup>kip2</sup>*, *Peg1* and *Snrpn*) in E9.5 embryos was analyzed by either RT-PCR (G) or northern blot hybridization (H). RT-PCR analysis of expression of *Igf2r* and *p57<sup>kip2</sup>* in two wild-type, two *Dnmt3L*<sup>-/-</sup>, and four *Dnmt3L*<sup>mat-/-</sup> embryos showed that expression of *Igf2r* and *p57<sup>kip2</sup>* was drastically reduced in all *Dnmt3L*<sup>mat-/-</sup> embryos. Northern analysis of *Peg1* and *Snrpn* expression with total RNA isolated from a pool of 5-6 E9.5 embryos for each genotype showed an increased expression (approximately twice the wild-type level) of *Peg1* and *Snrpn* in *Dnmt3L*<sup>mat-/-</sup> embryos as compared to the normal embryos. m, maternal allele; p, paternal allele.

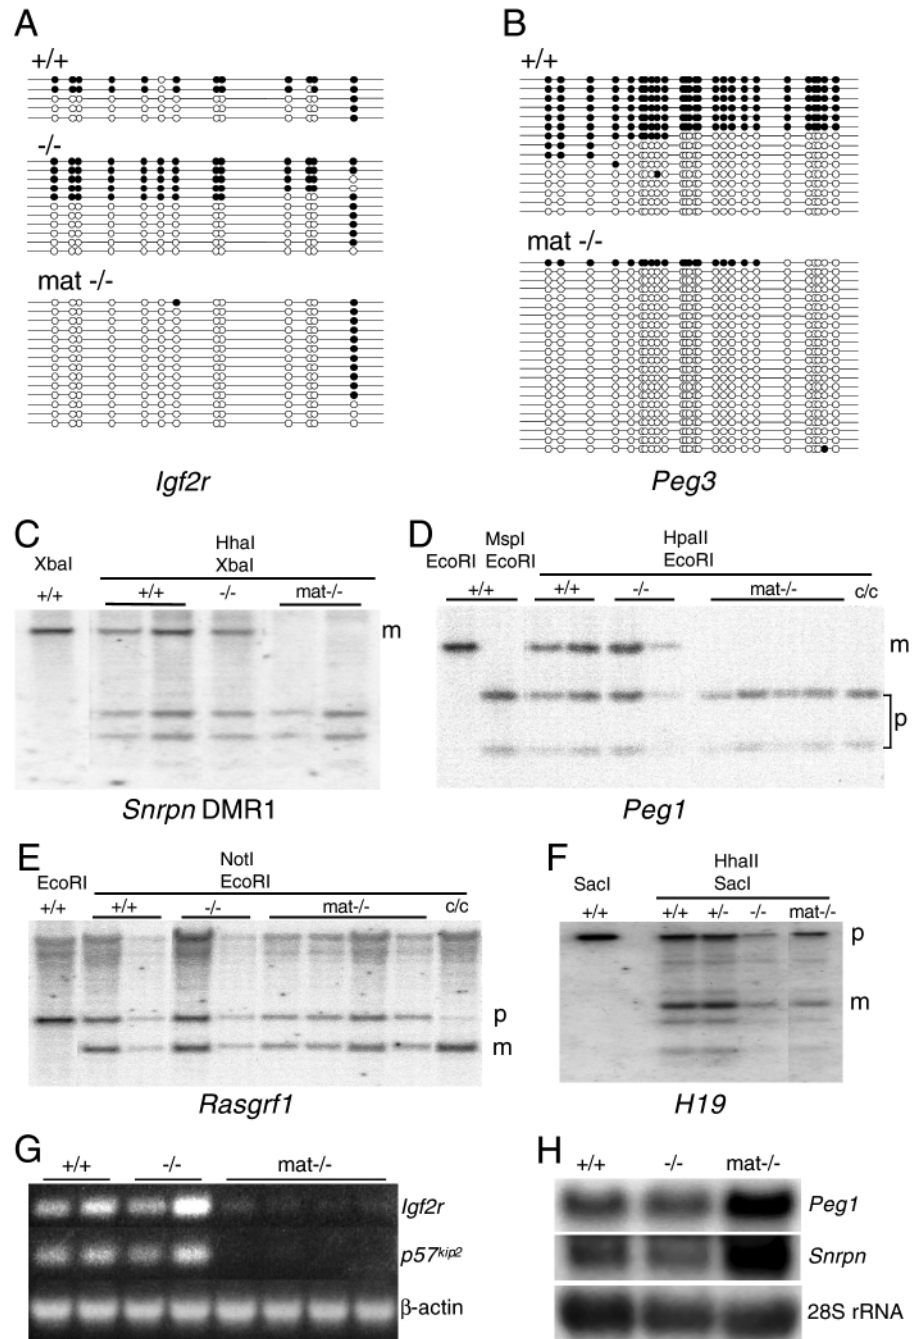

myc-Dnmt3b protein (Fig. 6A, lanes 3 and 9). Similar results were obtained when myc-Dnmt3L and GFP-Dnmt3a (or GFP-Dnmt3b) were cotransfected (data not shown).

To further test whether Dnmt3L could interact with Dnmt3a or Dnmt3b in live cells, we analyzed subcellular localization of Dnmt3L in the presence or absence of Dnmt3a or Dnmt3b by immunostaining of 3T3 cells expressing both myc-tagged Dnmt3L and GFP-tagged Dnmt3a or GFP-tagged Dnmt3b. We showed that Dnmt3L localized predominantly in the cytoplasm in the absence of Dnmt3a or Dnmt3b, whereas GFP-Dnmt3a or GFP-Dnmt3b alone localized predominantly to the heterochromatin foci in the nucleus (data not shown). Interestingly, cotransfection of myc-Dnmt3L and GFP-Dnmt3a resulted in relocation of Dnmt3L to the heterochromatin foci in >80% of the cells that expressed both proteins (Fig. 6B). Similar results were obtained with myc-Dnmt3L and GFP-Dnmt3b cotransfected cells (Fig. 6B, last line). These results suggest that Dnmt3L may be capable of forming a complex with Dnmt3a or Dnmt3b in vivo. Further studies will be necessary to determine whether

endogenous Dnmt3L and Dnmt3a (or dnmt3b) colocalize in the oocytes.

Since disruption of *Dnmt3b* was embryonic lethal and *Dnmt3a*<sup>-/-</sup> mice were growth retarded and failed to breed before death at 4-8 weeks after birth, we could not directly test the function of *Dnmt3a* and *Dnmt3b* in establishing genomic imprinting in the germ cells. To overcome this problem, we performed ovary transplantation by implanting ovaries from *Dnmt3a*<sup>-/-</sup> or [*Dnmt3a*<sup>-/-</sup>, *Dnmt3b*<sup>+/-</sup>] female mice to wild-type recipients. We then crossed the recipient females with wild-type male mice. From one recipient female, we obtained two embryos at E9.5 of gestation, which were morphologically normal. Genotype analysis indicated that one embryo was *Dnmt3a*<sup>+/-</sup> and the other was [*Dnmt3a*<sup>+/-</sup>, *Dnmt3b*<sup>+/-</sup>]. We confirmed by

Southern blot analysis that the donor ovary originated from a [*Dnmt3a*<sup>-/-</sup>, *Dnmt3b*<sup>+/-</sup>] female mouse. This result suggests that

oocyte maturation and meiosis in [*Dnmt3a*<sup>-/-</sup>, *Dnmt3b*<sup>+/-</sup>] female mice are probably normal as in *Dnmt3L*<sup>-/-</sup> females.

We then examined the methylation status of several imprinted genes. Similar to the *Dnmt3L*<sup>mat-/-</sup> embryos, we found that the DMRs of four maternally imprinted genes, *Igf2r*, *Peg1*, *Peg3* and *Snrpn* were unmethylated in the two embryos derived from the transplanted ovary (Fig. 7A-D). As controls, we showed that methylation of the paternally imprinted *H19* gene and repetitive DNA sequences such as the endogenous provirus DNA was unaffected (Fig. 7E,F). These results suggest that *Dnmt3a* and/or *Dnmt3b* are required for establishing maternal methylation imprints. Since female [*Dnmt3a*<sup>+/-</sup>, *Dnmt3b*<sup>+/-</sup>] mice were normal and fertile, we believed that *Dnmt3a* mutation was primarily responsible for the loss of methylation imprints in [*Dnmt3a*<sup>-/-</sup>, *Dnmt3b*<sup>+/-</sup>] oocytes. Interestingly, *Dnmt3a*<sup>-/-</sup> male mice display similar but less severe defects in spermatogenesis as *Dnmt3L*<sup>-/-</sup>. Together, our results suggest that *Dnmt3L* probably cooperates with the *Dnmt3* family de novo methyltransferases to regulate genomic imprinting during oocyte development.

## DISCUSSION

Genomic imprinting is a developmentally regulated process that controls expression of a small set of genes, estimated to be around a few hundreds, in the mammalian genome in a parent-of-origin-specific manner. Differential methylation of the paternal and maternal alleles has been detected in most known imprinted genes, and it is essential for the maintenance of mono-allelic expression of imprinted genes in development (Neumann and Barlow, 1996; Jaenisch, 1997; Tilghman, 1999; Ferguson-Smith and Surani, 2001). While DNA methylation is believed to be at least part of the imprinting mechanism, it is largely unknown as to how imprinted methylation is established during gametogenesis. In this study, we have provided genetic evidence that *Dnmt3L*, a *Dnmt3a*/*Dnmt3b* methyltransferase related protein, is required for the establishment of maternal genomic imprinting in the oocyte. Similar results were reported recently by Bourc'his et al., but it was not determined how *Dnmt3L* might regulate DNA methylation (Bourc'his et al., 2001). We show further that *Dnmt3L* can interact with *Dnmt3a* and *Dnmt3b* in mammalian cells and [*Dnmt3a*<sup>-/-</sup>, *Dnmt3b*<sup>+/-</sup>] female mice also fail to establish imprinted methylation patterns in their oocytes (Figs 6 and 7). Thus, our study has identified the *Dnmt3* family DNA methyltransferases as the major enzymatic machinery responsible for establishing maternal genomic imprinting.

DNA methylation is believed to be the epigenetic marker in the gametes for genomic

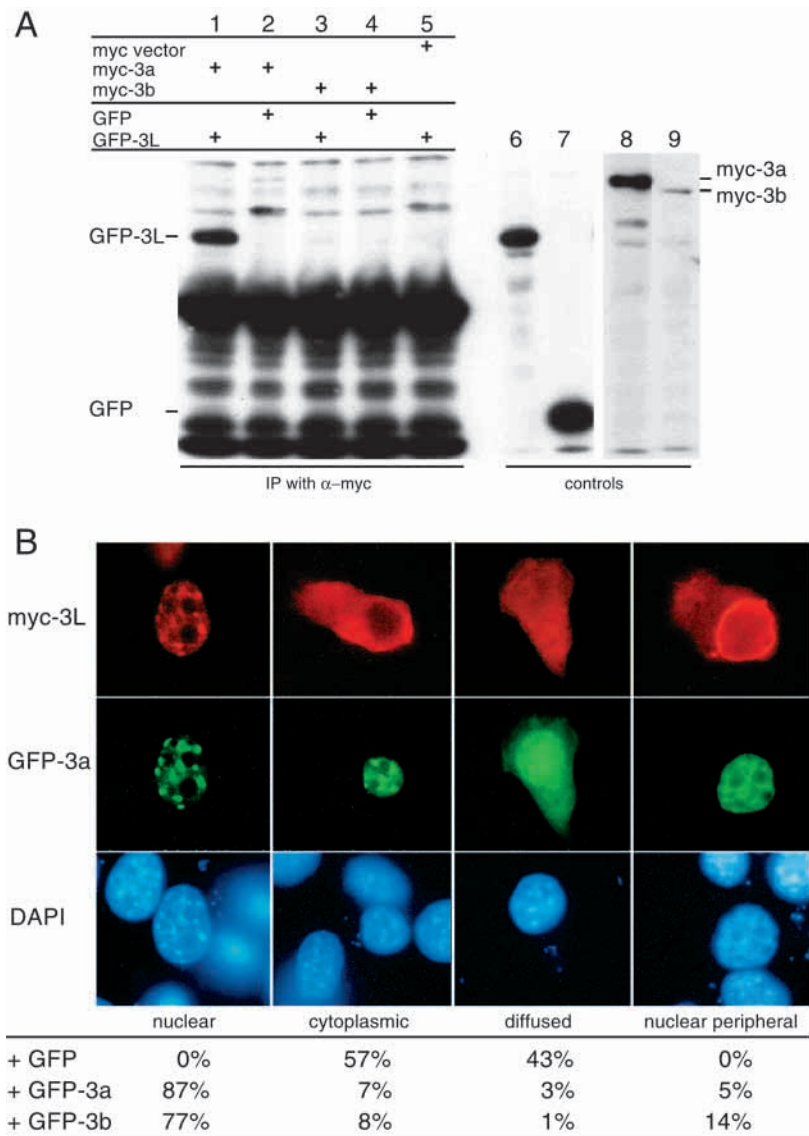

**Fig. 6.** Interaction between *Dnmt3L* and the *Dnmt3* family methyltransferases. (A) COS cells transfected with GFP or GFP-3L alone (lanes 6 and 7) or along with myc-3a, myc-3b, or myc vector (lanes 1-5) were lysed and immunoprecipitated with anti-myc antibody. The bound proteins were separated on a 10% SDS-PAGE gel and immunoblotted with anti-GFP antibodies. The expression level of myc-3a and myc-3b in lanes 1 and 3 is shown by immunoblot using anti-myc antibody (lanes 8 and 9). The position of the GFP and GFP-3L is indicated. (B) NIH3T3 cells were transfected with myc-3L alone (not shown) or with myc-3L and GFP, GFP-3a, or GFP-3b. After 12 hours, the cells were fixed and immunostained with anti-c-myc antibodies followed by rhodamine-conjugated goat anti-mouse secondary antibodies. The myc-3L and GFP-3a proteins in transfected cells are shown as red and green fluorescence, respectively. The nuclei are stained with DAPI. The typical myc-3L localization patterns fall into four categories: nuclear, cytoplasmic, diffused and nuclear peripheral, and are shown in the top panels (red). In myc-3L alone or myc-3L and GFP, only cytoplasmic and diffused patterns were observed. In cells co-transfected with myc-3L and GFP-3a or GFP-3b, myc-3L is localized predominantly in the nuclei and colocalized with GFP-3a or GFP-3b. The percentage of cells expressing both myc-3L and GFP-3a or myc-3L and GFP-3b in each category is shown at the bottom. For myc-3L alone, 30 nuclei were scored and for other cotransfection experiments, 100-150 nuclei were scored.



imprinting. However, no evidence is available to show that such methylation markers are necessary for transmission of the imprinting signal from gametes to offspring. Nuclear transfer experiments provided compelling evidence that epigenetic modification in the growing oocytes is necessary for establishing genomic imprinting and appropriate expression of some imprinted genes in the offspring (Obata et al., 1998). However, it was not clear whether DNA methylation or other heritable epigenetic mechanisms such as histone modification and chromatin conformation was responsible for the establishment of the imprinting signals. Bourc'his et al. (Bourc'his et al., 2001) reported that several imprinted genes on chromosome 7 were expressed from both paternal and maternal alleles and two other genes, *Ip1* and *Cdkn1*, were silent in embryos from *Dnmt3L*<sup>-/-</sup> mothers. We showed here that disruption of imprinted methylation patterns in *Dnmt3L*<sup>-/-</sup> mice led to bi-allelic expression of *Peg1* and *Snrpn* and bi-allelic silence of *Igf2r* and *p57<sup>Kip2</sup>* in the offspring. Together, these results provide compelling evidence that the methylation markers of imprinted genes established in the oocytes are essential epigenetic signals for the establishment and transmission of genomic imprinting.

Among the 40 or so imprinted genes identified in the mouse, half are maternally expressed and the other half are paternally expressed. However, the majority of these imprinted genes inherit methylation imprints from the mother, whereas only two genes, *H19* and *rasgrf1*, are so far known to inherit the methylation imprints from the father (Reik and Walter, 2001). Although the functional significance of such asymmetric inheritance of methylation imprints is unclear, this intriguing phenomenon indicates that methylation imprints are primarily established in the oocytes. *Dnmt1* was previously predicted to be the enzyme responsible for de novo methylation of imprinted genes in oocytes because a maternal form of *Dnmt1* (*Dnmt1o*) was found to be highly expressed in the oocytes (Mertineit et al., 1998). However, recent experiments failed to support such a notion, as inactivation of the maternal *Dnmt1o* does not perturb the establishment of genomic imprinting in the oocytes; instead, the maintenance of imprinted methylation patterns in preimplantation embryos was partially impaired in embryos lacking the maternal *Dnmt1o* (Howell et al., 2001). These results are consistent with *Dnmt1* being primarily responsible for the maintenance of DNA methylation patterns during mammalian development.

Unlike *Dnmt1*, *Dnmt3a* and *Dnmt3b* have been shown to be primarily responsible for de novo methylation of the mouse genome during early embryonic development (Okano et al., 1999). Here we provide genetic evidence that the *Dnmt3* family methyltransferases are also required for de novo methylation of imprinted genes during oocyte development. The finding that [*Dnmt3a*<sup>+/-</sup>, *Dnmt3b*<sup>+/-</sup>] female mice are fertile, but [*Dnmt3a*<sup>-/-</sup>, *Dnmt3b*<sup>+/-</sup>] oocytes are defective in establishing proper methylation imprints suggests that *Dnmt3a* probably contributes

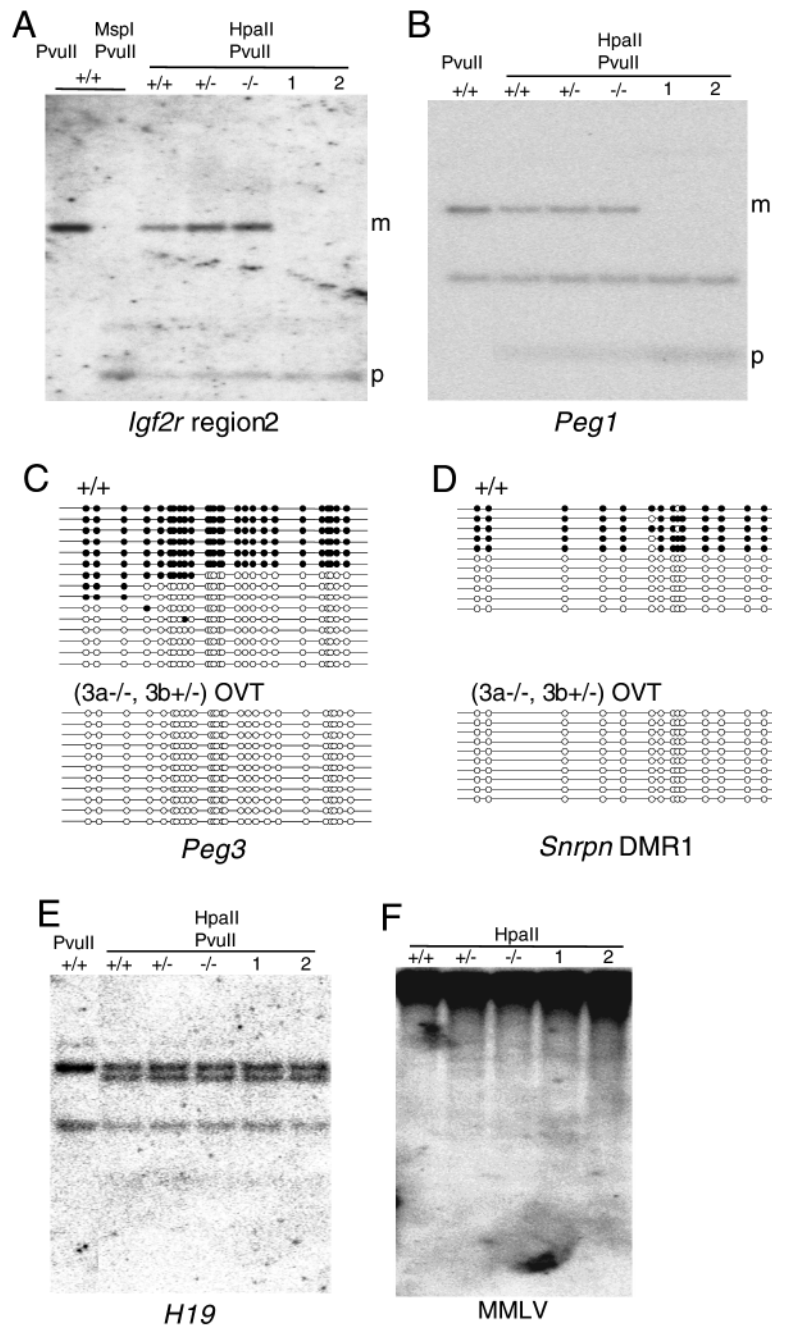

**Fig. 7.** Methylation of imprinted genes in embryos derived from a transplanted [*Dnmt3a*<sup>-/-</sup>, *Dnmt3b*<sup>+/-</sup>] ovary. (A-D) Methylation of four imprinted genes (*Igf2r*, *Peg1*, *Peg3*, and *Snrpn*) was analyzed either by Southern blot hybridization (A,B) or bisulfite sequencing (C,D) with DNA isolated from E9.5 wild-type (+/+), *Dnmt3a*<sup>+/-</sup> (+/-), and *Dnmt3a*<sup>-/-</sup> (-/-) embryos, and two embryos derived from the [*Dnmt3a*<sup>-/-</sup>, *Dnmt3b*<sup>+/-</sup>] oocytes (labeled as 1, 2). In A and B, DNA was digested with designated restriction enzymes and Southern blots were hybridized with probes of *Igf2r* region 2 (A) or *Peg1* DMR (B). Bisulfite sequencing analysis of methylation (black circles) of *Peg3* DMR and *Snrpn* DMR1 in wild type and embryos 1 and 2 derived from ovary transplantation (OVT) (C,D). The maternal alleles of *Igf2r*, *Peg1*, *Peg3* and *Snrpn* were almost completely unmethylated in the two embryos derived from the [*Dnmt3a*<sup>-/-</sup>, *Dnmt3b*<sup>+/-</sup>] mother, but they were methylated in *Dnmt3a*<sup>+/-</sup> and *Dnmt3a*<sup>-/-</sup> embryos from *Dnmt3a*<sup>+/-</sup> mothers. (E,F) Methylation of *H19* (E) and MMLV (F) remained unchanged. Methylation of the paternally imprinted *H19* gene and non-imprinted endogenous MMLV DNA was unaffected in all embryos tested.

more, if not entirely, to the de novo methylation of imprinted genes. Analysis of expression patterns of Dnmt3a and Dnmt3b during oocyte development and inactivation of individual enzymes specifically in primordial germ cells will determine the function of each enzyme in establishing genomic imprinting.

In spite of the fact that Dnmt3a and Dnmt3b can initiate de novo methylation in both early embryos and germ cells, they appear to have different target specificity at these two stages. In the early embryos, Dnmt3a and Dnmt3b actively methylate repetitive elements, endogenous retrovirus and retrotransposons and some unique genes such as *Xist*, but they omit the sequences of DMRs in imprinted genes such that the imprinted methylation patterns are preserved. In contrast, Dnmt3a and Dnmt3b appear to selectively methylate the DMRs of imprinted genes in oocytes. Such cell lineage-specific de novo methylation is probably regulated by proteins that are either involved in targeting Dnmt3 methyltransferases to different sequences or in chromatin remodeling that changes chromatin accessibility at imprinted loci. Dnmt3L is the first protein that appears to confer sequence specificity of DNA methylation. While the precise mechanism by which Dnmt3L regulates de novo methylation of imprinted genes remains to be elucidated, we would like to consider the following possible scenarios. First, Dnmt3L may facilitate genome-wide de novo methylation by Dnmt3a and Dnmt3b specifically in the oocytes. In other words, Dnmt3L mediates de novo methylation of both the DMRs of imprinted genes and the bulk genomic DNA. Gamete-specific methylation patterns of imprinted genes are maintained after fertilization simply because these sequences can escape genome-wide demethylation and de novo methylation during preimplantation development (Reik et al., 2001). To test this hypothesis, it will be important to determine whether de novo methylation of repetitive elements and non-imprinted genes is also disrupted in *Dnmt3L*<sup>-/-</sup> oocytes. Alternatively, Dnmt3L may target Dnmt3a and Dnmt3b specifically to the DMRs of imprinted genes in the oocytes. The ability of Dnmt3L to interact with Dnmt3a and Dnmt3b in mammalian cell provides the molecular basis for such targeting events. Dnmt3L may form a complex with the Dnmt3 family methyltransferases, which may selectively bind to DMRs of imprinted genes. Interestingly, many DMRs consist of direct repeats that may form a special chromatin conformation recognized favorably by the Dnmt3L and Dnmt3 methyltransferase complex. Although *Dnmt3L* transcripts are also highly expressed in ES cells, methylation of imprinted genes can not be restored in ES cells once it is lost (Tucker et al., 1996), suggesting that imprinted genes are protected by other factors from being methylated by the Dnmt3 methyltransferases in ES cells. Further studies need to be conducted to test these hypotheses.

In this study, we have also shown that Dnmt3L is required for spermatogenesis. The lack of Dnmt3L appears to prevent spermatogonia from undergoing differentiation or meiosis (Fig. 3). Interestingly, Dnmt3a is also required for spermatogenesis (data not shown) though the testicular phenotype of *Dnmt3a*<sup>-/-</sup> mice is less severe, likely due to functional compensation by *Dnmt3b*. These results suggest that the Dnmt3 family DNA methyltransferases and Dnmt3L may also cooperate to regulate spermatogenesis. Whether defects in spermatogenesis is caused by disruption of de novo methylation in the male germ cells is

a question of great interest and will be addressed rigorously in future studies. It also remains to be determined whether the Dnmt3 family methyltransferases and Dnmt3L are required for establishing methylation imprinting of *H19* and *rasgrfl* in the male germ cells.

We are indebted to many colleagues for providing us with various probes for studying methylation and expression of imprinted genes and especially to Drs J. Walter and A. Paldi for sharing unpublished information on bisulfite sequencing primers and protocols. We thank Dr S. Xie for isolating the genomic clones from a phage genomic library, Dr H. Beppu for help with whole amount in situ hybridization, and Zhenjuan Wang for technical assistance. This work was supported by NIH grants (CA82389 and GM52106) to E. L. M. O. is a special fellow of the Leukemia and Lymphoma Society.

## REFERENCES

- Aapola, U., Kawasaki, K., Scott, H. S., Ollila, J., Vihinen, M., Heino, M., Shintani, A., Minoshima, S., Krohn, K., Antonarakis, S. E., Shimizu, N., Kudoh, J. and Peterson, P. (2000). Isolation and initial characterization of a novel zinc finger gene, DNMT3L, on 21q22.3, related to the cytosine-5-methyltransferase 3 gene family. *Genomics* **65**, 293-298.
- Bachman, K. E., Rountree, M. R. and Baylin, S. B. (2001). Dnmt3a and Dnmt3b are transcriptional repressors that exhibit unique localization properties to heterochromatin. *J. Biol. Chem.* **276**, 32282-32287.
- Barlow, D. P. (1995). Gametic imprinting in mammals. *Science* **270**, 1610-1613.
- Barton, S. C., Surani, M. A. and Norris, M. L. (1984). Role of paternal and maternal genomes in mouse development. *Nature* **311**, 374-376.
- Bird, A. P. and Wolffe, A. P. (1999). Methylation-induced repression—belts, braces, and chromatin. *Cell* **99**, 451-454.
- Bourc'his, D., Xu, G. L., Lin, C. S., Bollman, B. and Bestor, T. H. (2001). Dnmt3L and the establishment of maternal genomic imprints. *Science* **294**, 2536-2539.
- Caspary, T., Cleary, M. A., Baker, C. C., Guan, X. J. and Tilghman, S. M. (1998). Multiple mechanisms regulate imprinting of the mouse distal chromosome 7 gene cluster. *Mol. Cell. Biol.* **18**, 3466-3474.
- Chen, T. and Richard, S. (1998). Structure-function analysis of Qk1: a lethal point mutation in mouse quaking prevents homodimerization. *Mol. Cell. Biol.* **18**, 4863-4871.
- Cheng, X., Kumar, S., Posfai, J., Pflugrath, J. W. and Roberts, R. J. (1993). Crystal structure of the HhaI DNA methyltransferase complexed with S-adenosyl-L-methionine. *Cell* **74**, 299-307.
- Clark, S. J., Harrison, J., Paul, C. L. and Frommer, M. (1994). High sensitivity mapping of methylated cytosines. *Nucleic Acids Res.* **22**, 2990-2997.
- Davis, T. L., Yang, G. J., McCarrey, J. R. and Bartolomei, M. S. (2000). The H19 methylation imprint is erased and re-established differentially on the parental alleles during male germ cell development. *Hum. Mol. Genet.* **9**, 2885-2894.
- Dodge, J., Ramsahoye, B. H., Wo, Z. G., Okano, M. and Li, E. (2002). De novo methylation of MMLV provirus in embryonic stem cells: CpG versus non-CpG methylation. *Gene* (in press).
- Feil, R., Walter, J., Allen, N. D. and Reik, W. (1994). Developmental control of allelic methylation in the imprinted mouse *Igf2* and *H19* genes. *Development* **120**, 2933-2943.
- Ferguson-Smith, A. C. and Surani, M. A. (2001). Imprinting and the epigenetic asymmetry between parental genomes. *Science* **293**, 1086-1089.
- Fuks, F., Burgers, W. A., Godin, N., Kasai, M. and Kouzarides, T. (2001). Dnmt3a binds deacetylases and is recruited by a sequence-specific repressor to silence transcription. *EMBO J.* **20**, 2536-2544.
- Hogan, B., Beddington, R., Costantini, F. and Lacy, E. (1994). *Manipulating the Mouse Embryo*. 2nd ed. Cold Spring Harbor, New York: Cold Spring Harbor Laboratory Press.
- Howell, C. Y., Bestor, T. H., Ding, F., Latham, K. E., Mertineit, C., Trasler, J. M. and Chaillet, J. R. (2001). Genomic imprinting disrupted by a maternal effect mutation in the Dnmt1 gene. *Cell* **104**, 829-838.
- Jaenisch, R. (1997). DNA methylation and imprinting: why bother? *Trends Genet* **13**, 323-329.
- Lefebvre, L., Viville, S., Barton, S. C., Ishino, F. and Surani, M. A. (1997)

- Genomic structure and parent-of-origin-specific methylation of Peg1. *Hum. Mol. Genet.* **6**, 1907-1915.
- Leff, S. E., Brannan, C. I., Reed, M. L., Ozcelik, T., Francke, U., Copeland, N. G. and Jenkins, N. A.** (1992). Maternal imprinting of the mouse Snrpn gene and conserved linkage homology with the human Prader-Willi syndrome region. *Nat. Genet.* **2**, 259-264.
- Lei, H., Oh, S. P., Okano, M., Juttermann, R., Goss, K. A., Jaenisch, R. and Li, E.** (1996). De novo DNA cytosine methyltransferase activities in mouse embryonic stem cells. *Development* **122**, 3195-3205.
- Li, E., Bestor, T. H. and Jaenisch, R.** (1992). Targeted mutation of the DNA methyltransferase gene results in embryonic lethality. *Cell* **69**, 915-926.
- Li, E., Beard, C. and Jaenisch, R.** (1993). Role for DNA methylation in genomic imprinting. *Nature* **366**, 362-365.
- Li, L. L., Szeto, I. Y., Cattanach, B. M., Ishino, F. and Surani, M. A.** (2000). Organization and parent-of-origin-specific methylation of imprinted Peg3 gene on mouse proximal chromosome 7. *Genomics* **63**, 333-340.
- Lyko, F., Ramsahoye, B. H., Kashevsky, H., Tudor, M., Mastrangelo, M. A., Orr-Weaver, T. L. and Jaenisch, R.** (1999). Mammalian (cytosine-5) methyltransferases cause genomic DNA methylation and lethality in Drosophila. *Nat. Genet.* **23**, 363-366.
- McGrath, J. and Solter, D.** (1984). Completion of mouse embryogenesis requires both the maternal and paternal genomes. *Cell* **37**, 179-183.
- Mertineit, C., Yoder, J. A., Taketo, T., Laird, D. W., Trasler, J. M. and Bestor, T. H.** (1998). Sex-specific exons control DNA methyltransferase in mammalian germ cells. *Development* **125**, 889-897.
- Moore, T. and Haig, D.** (1991). Genomic imprinting in mammalian development: a parental tug-of-war. *Trends Genet.* **7**, 45-49.
- Mountford, P., Zevnik, B., Duwel, A., Nichols, J., Li, M., Dani, C., Robertson, M., Chambers, I. and Smith, A.** (1994). Dicistronic targeting constructs: reporters and modifiers of mammalian gene expression. *Proc. Natl. Acad. Sci. USA* **91**, 4303-4307.
- Neumann, B. and Barlow, D. P.** (1996). Multiple roles for DNA methylation in gametic imprinting. *Curr. Opin. Genet. Dev.* **6**, 159-163.
- Obata, Y., Kaneko-Ishino, T., Koide, T., Takai, Y., Ueda, T., Domeki, I., Shiroishi, T., Ishino, F. and Kono, T.** (1998). Disruption of primary imprinting during oocyte growth leads to the modified expression of imprinted genes during embryogenesis. *Development* **125**, 1553-1560.
- Okano, M., Xie, S. and Li, E.** (1998). Cloning and characterization of a family of novel mammalian DNA (cytosine-5) methyltransferases. *Nat. Genet.* **19**, 219-220.
- Okano, M., Bell, D. W., Haber, D. A. and Li, E.** (1999). DNA methyltransferases Dnmt3a and Dnmt3b are essential for de novo methylation and mammalian development. *Cell* **99**, 247-257.
- Pearsall, R. S., Plass, C., Romano, M. A., Garrick, M. D., Shibata, H., Hayashizaki, Y. and Held, W. A.** (1999). A direct repeat sequence at the Rasgrf1 locus and imprinted expression. *Genomics* **55**, 194-201.
- Reik, W. and Walter, J.** (2001). Evolution of imprinting mechanisms: the battle of the sexes begins in the zygote. *Nat. Genet.* **27**, 255-256.
- Reik, W., Dean, W. and Walter, J.** (2001). Epigenetic reprogramming in mammalian development. *Science* **293**, 1089-1093.
- Robertson, K. D. and Wolffe, A. P.** (2000). DNA methylation in health and disease. *Nat. Rev. Genet.* **1**, 11-19.
- Sado, T., Fenner, M. H., Tan, S.-S., Tam, P., Shioda, T. and Li, E.** (2000). X-inactivation in the mouse embryo deficient for *Dnmt1*: Distinct effect of hypomethylation on imprinted and random X-inactivation. *Dev. Biol.* **255**, 294-303.
- Shemer, R., Birger, Y., Riggs, A. D. and Razin, A.** (1997). Structure of the imprinted mouse Snrpn gene and establishment of its parental-specific methylation pattern. *Proc. Natl. Acad. Sci. USA* **94**, 10267-10272.
- Stöger, R., Kubicka, P., Liu, C. G., Kafri, T., Razin, A., Cedar, H. and Barlow, D. P.** (1993). Maternal-specific methylation of the imprinted mouse Igf2r locus identifies the expressed locus as carrying the imprinting signal. *Cell* **73**, 61-71.
- Surani, M. A., Barton, S. C. and Norris, M. L.** (1984). Development of reconstituted mouse eggs suggests imprinting of the genome during gametogenesis. *Nature* **308**, 548-550.
- Tilghman, S. M.** (1999). The sins of the fathers and mothers: genomic imprinting in mammalian development. *Cell* **96**, 185-193.
- Tremblay, K. D., Saam, J. R., Ingram, R. S., Tilghman, S. M. and Bartolomei, M. S.** (1995). A paternal-specific methylation imprint marks the alleles of the mouse H19 gene. *Nat. Genet.* **9**, 407-413.
- Tucker, K. L., Beard, C., Dausmann, J., Jackson-Grusby, L., Laird, P. W., Lei, H., Li, E. and Jaenisch, R.** (1996). Germ-line passage is required for establishment of methylation and expression patterns of imprinted but not of nonimprinted genes. *Genes Dev.* **10**, 1008-1020.
- Ueda, T., Abe, K., Miura, A., Yuzuriha, M., Zubair, M., Noguchi, M., Niwa, K., Kawase, Y., Kono, T., Matsuda, Y., Fujimoto, H., Shibata, H., Hayashizaki, Y. and Sasaki, H.** (2000). The paternal methylation imprint of the mouse H19 locus is acquired in the gonocyte stage during foetal testis development. *Genes Cells* **5**, 649-659.
